# Supplementary material for: Synthesis of protected γ-carboxyglutamates and γ-acylglutamates by rearrangement of N,N-diacylglutamates
Source: Royal Society of Chemistry journal article supplement (doi:10.1039/b503900b), 2005-01-01

# Spectrum 1

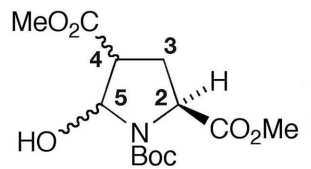

18  
500 MHz in <sup>2</sup>HCl<sub>3</sub>

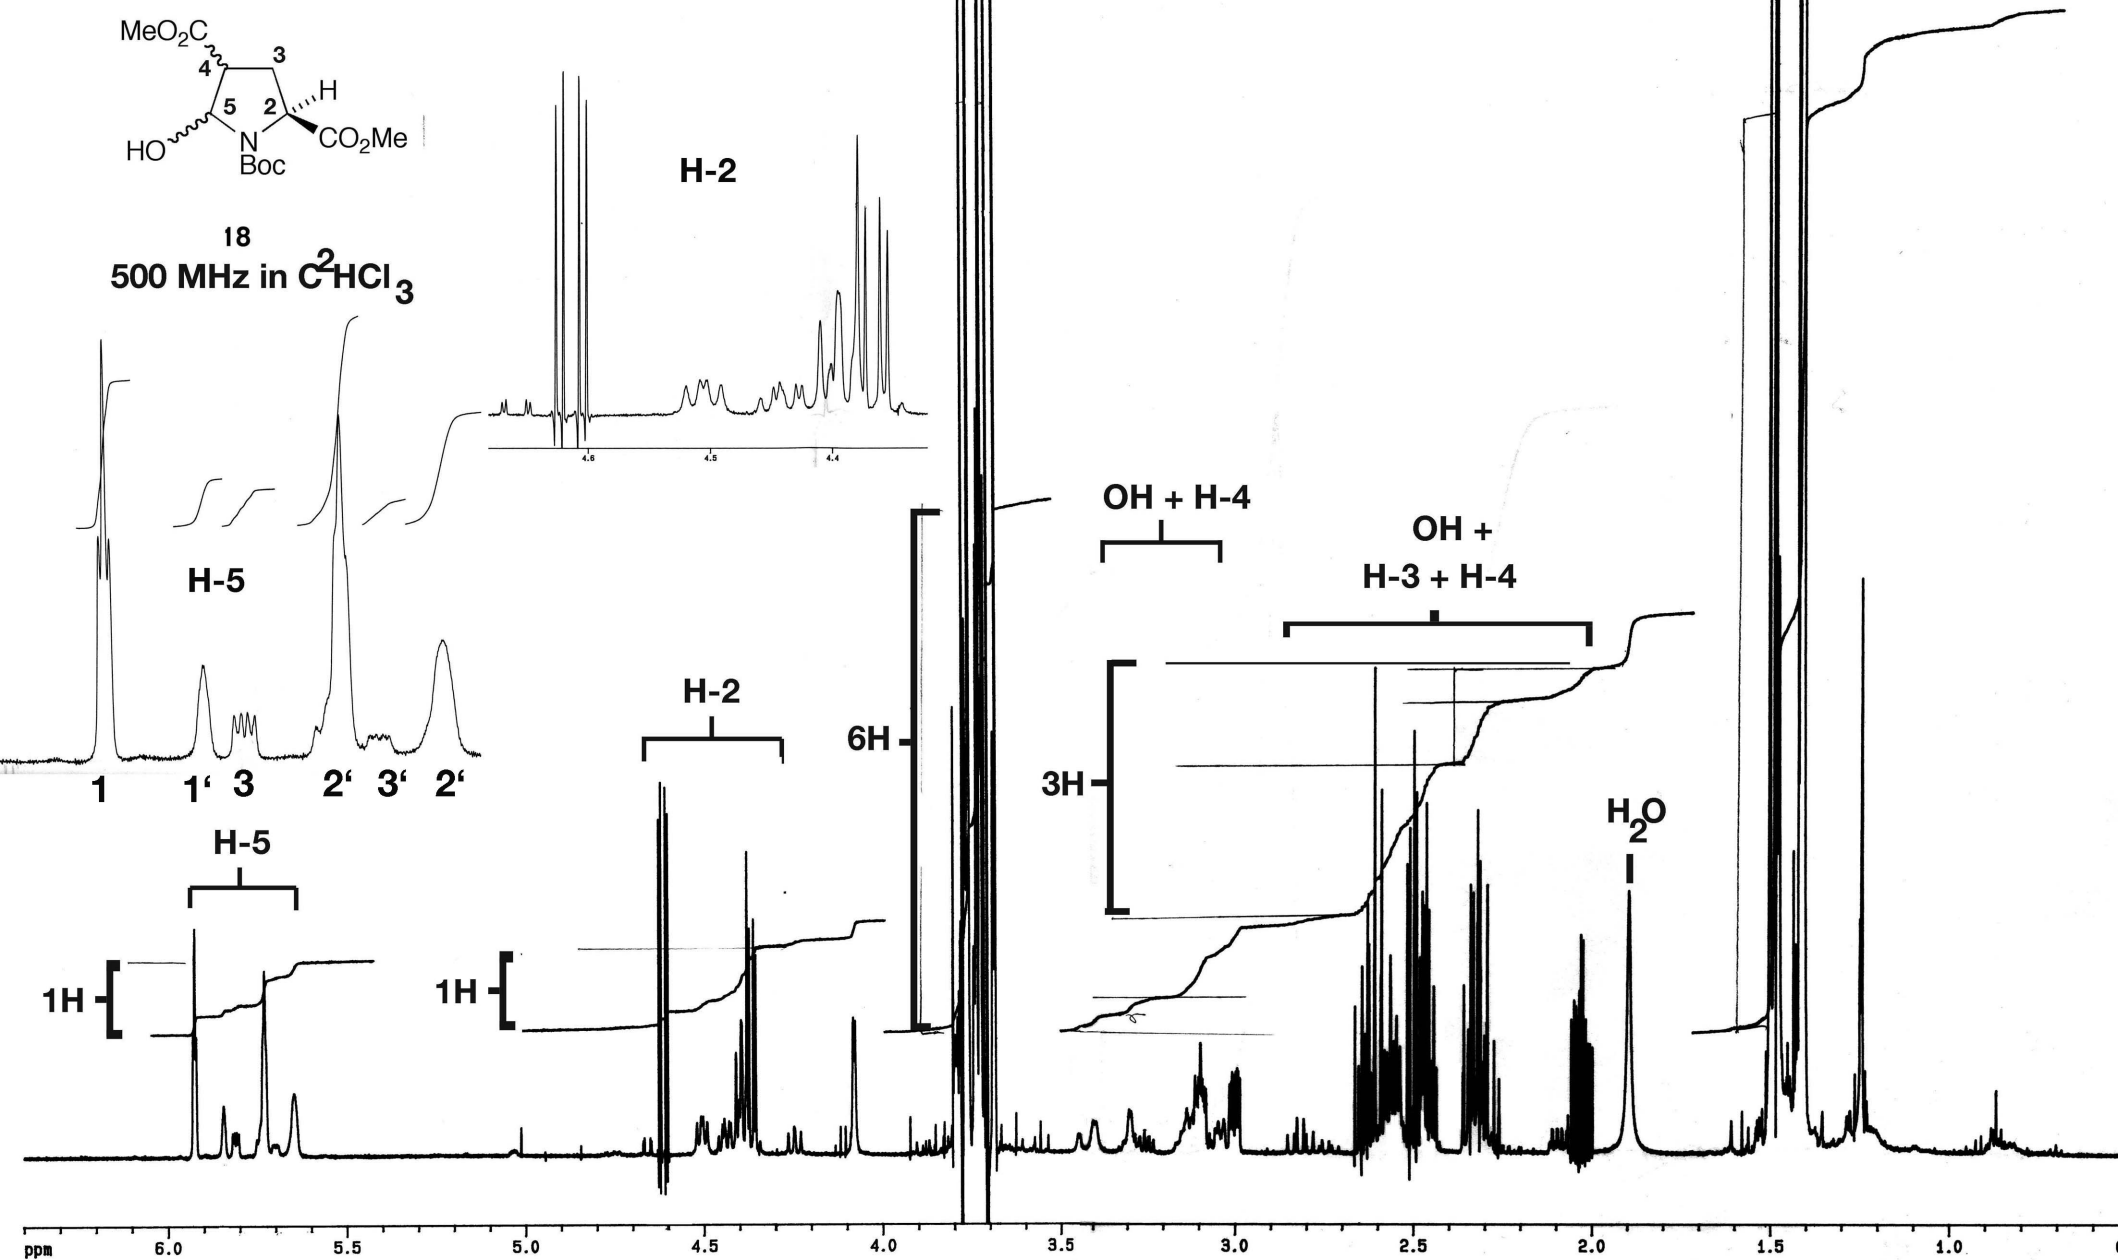

# Spectrum 2

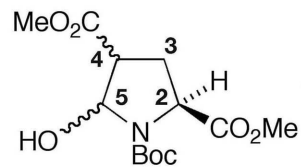

18  
500 MHz in C<sup>2</sup>HCl<sub>3</sub>  
C<sup>2</sup>H<sub>3</sub>O<sup>2</sup>H added

H-5

H-4

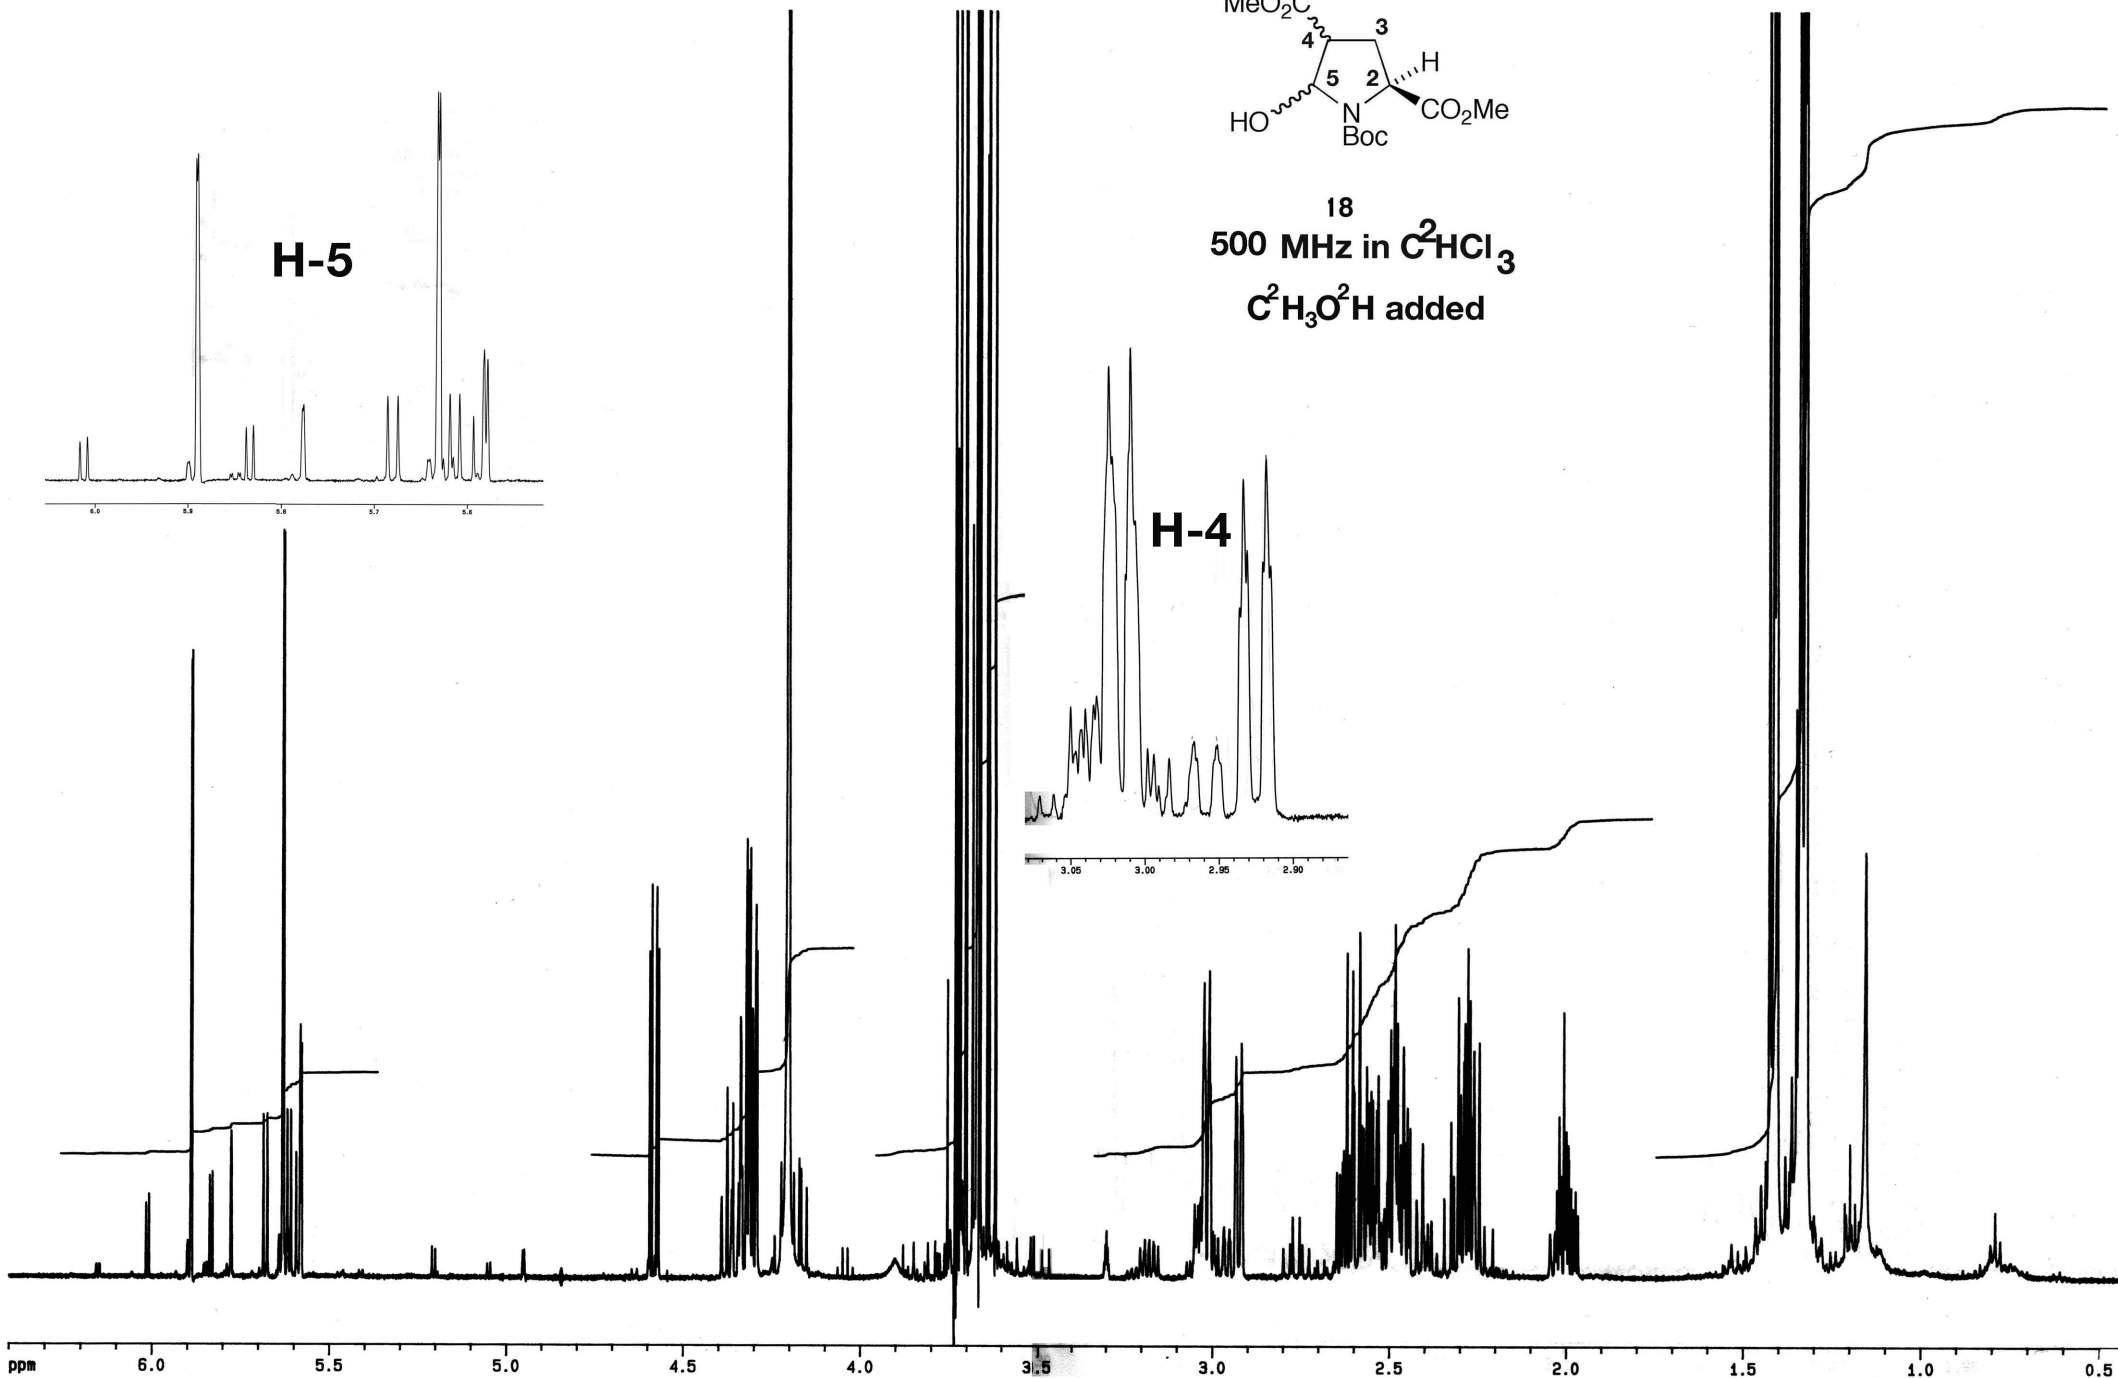

### Spectrum 3

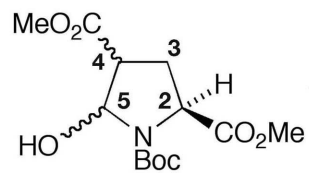

18  
125.8 MHz in <sup>2</sup>CHCl<sub>3</sub>

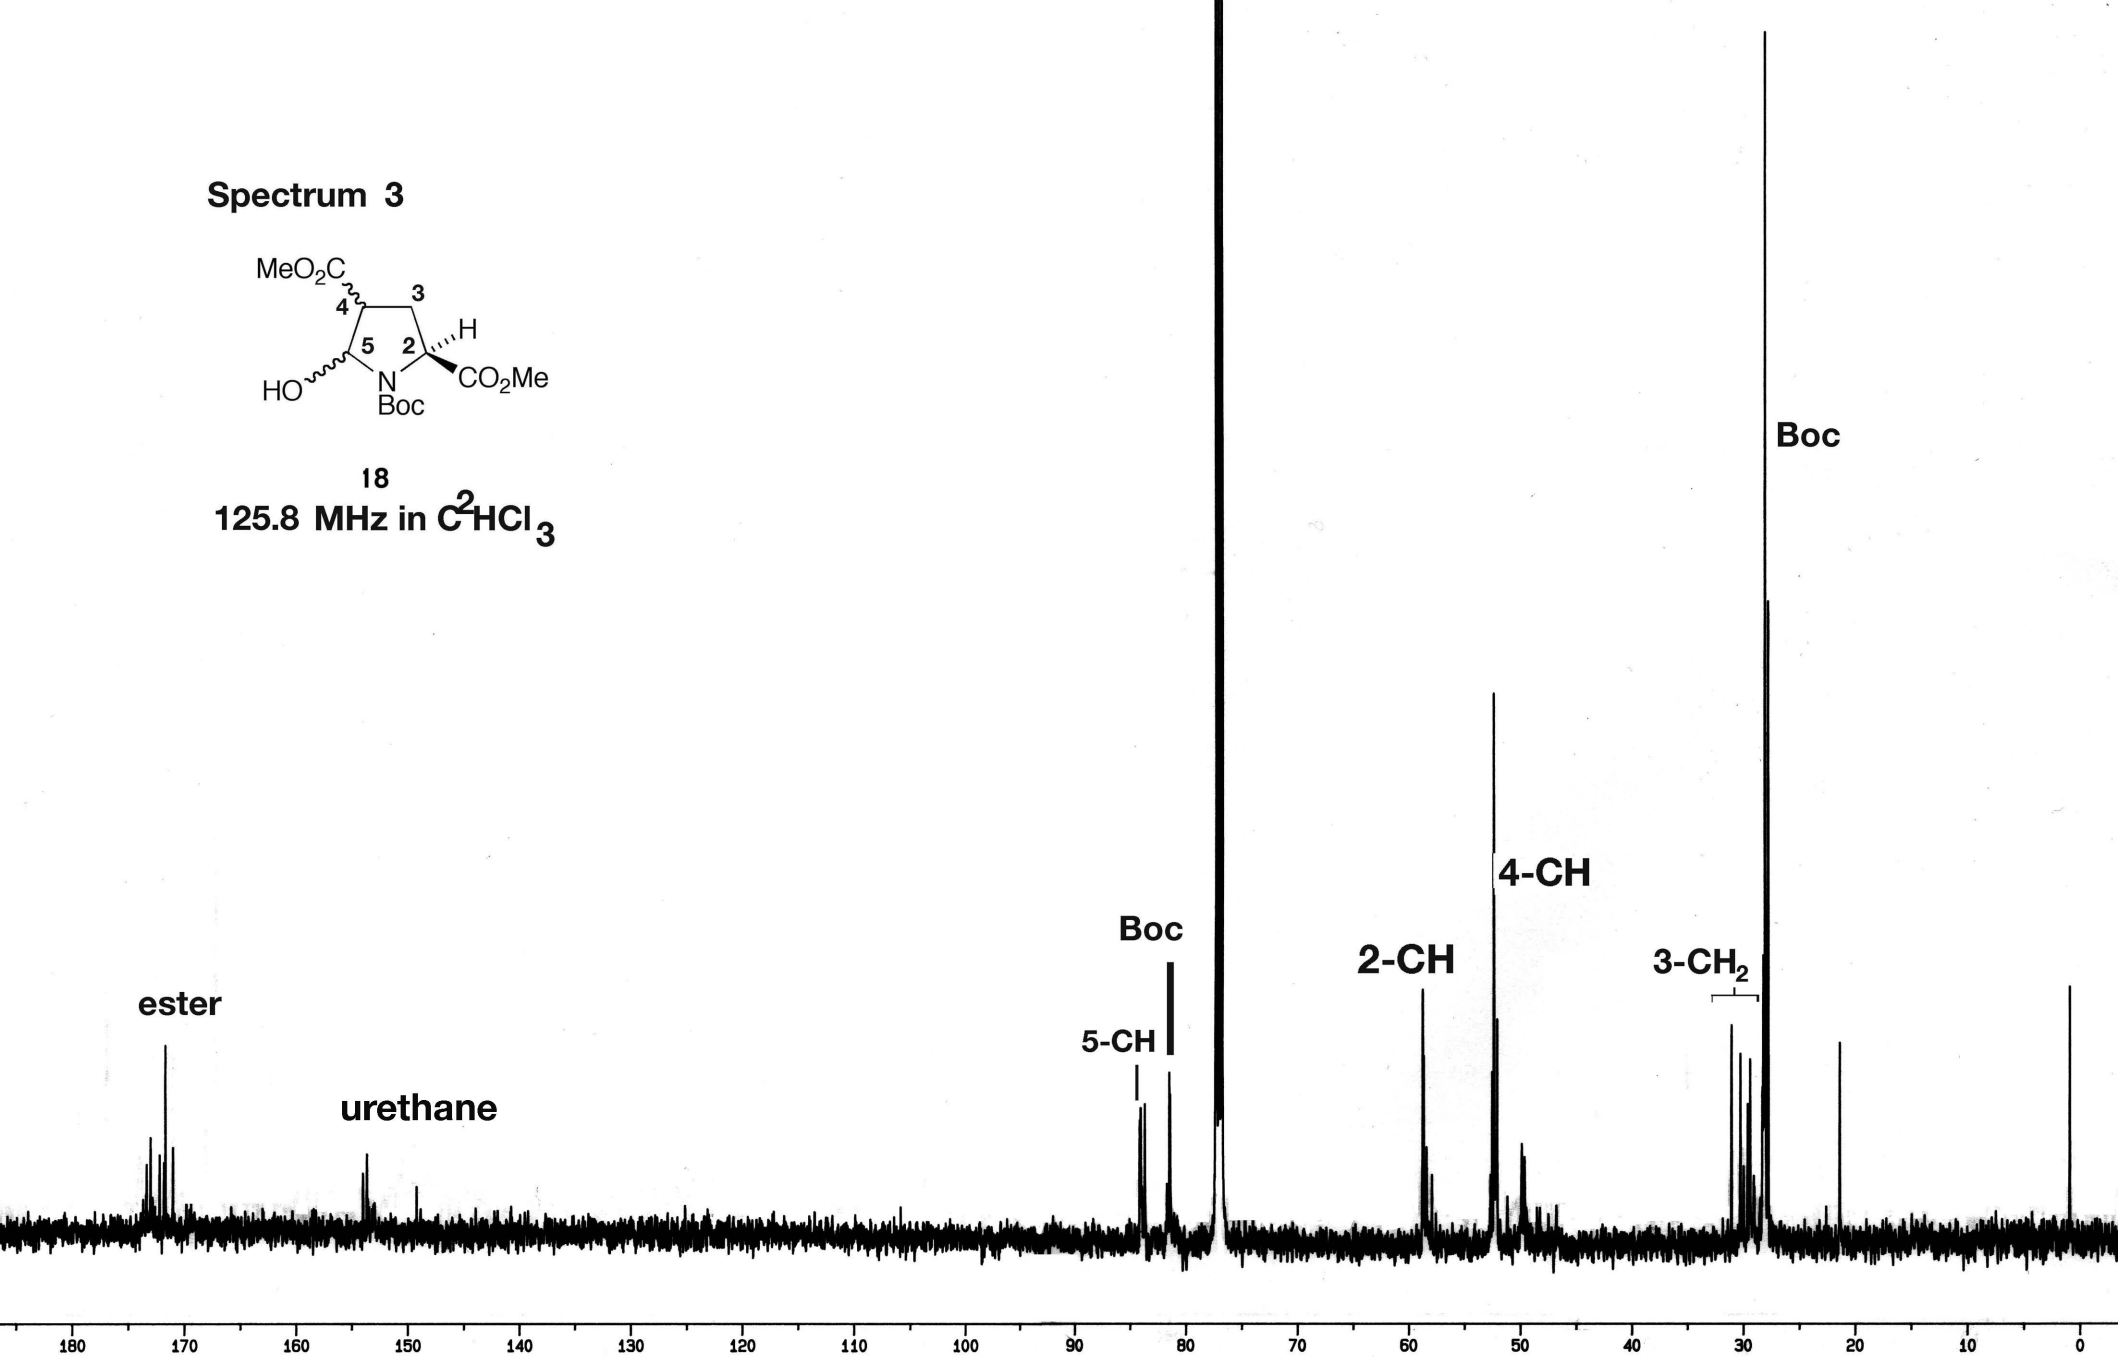

# Spectrum 4

in  $C^2H_3Cl$  with added  $C^2H_3O^2H$

2D COSY

double quantum filtered at 253 K

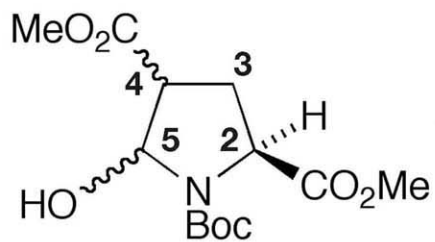

18

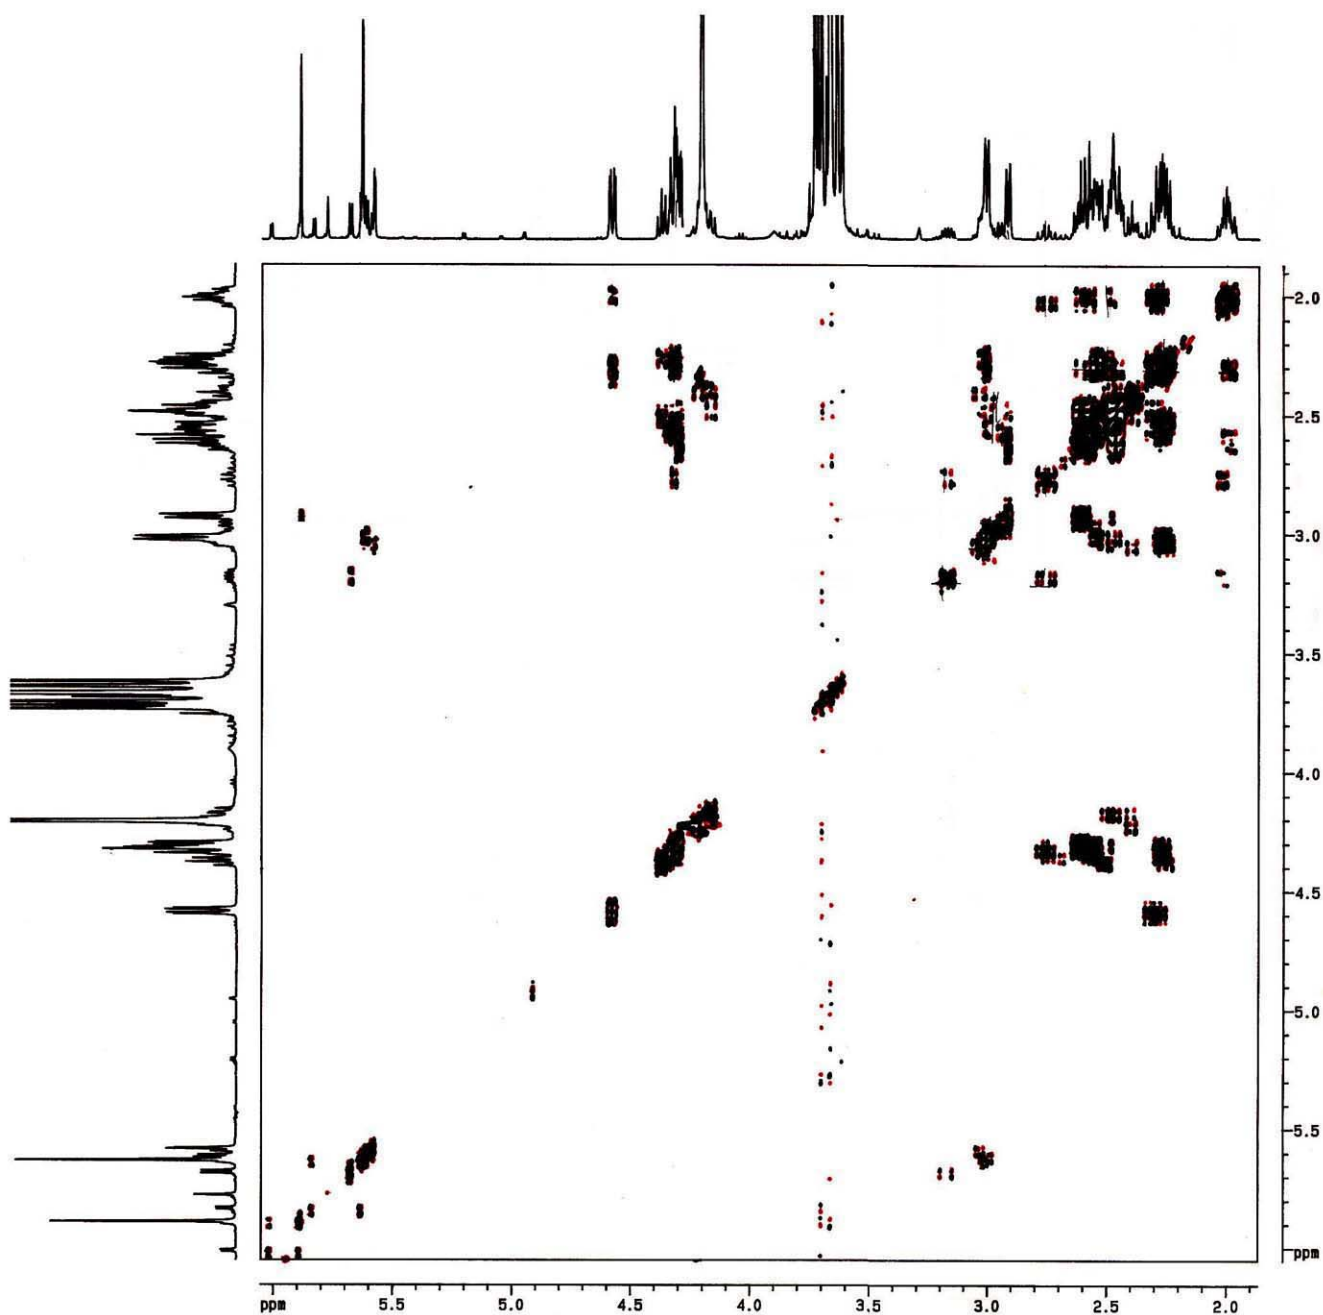

# Spectrum 5

connect H-5 with H-4

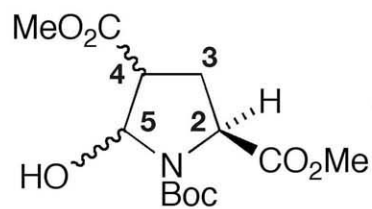

18

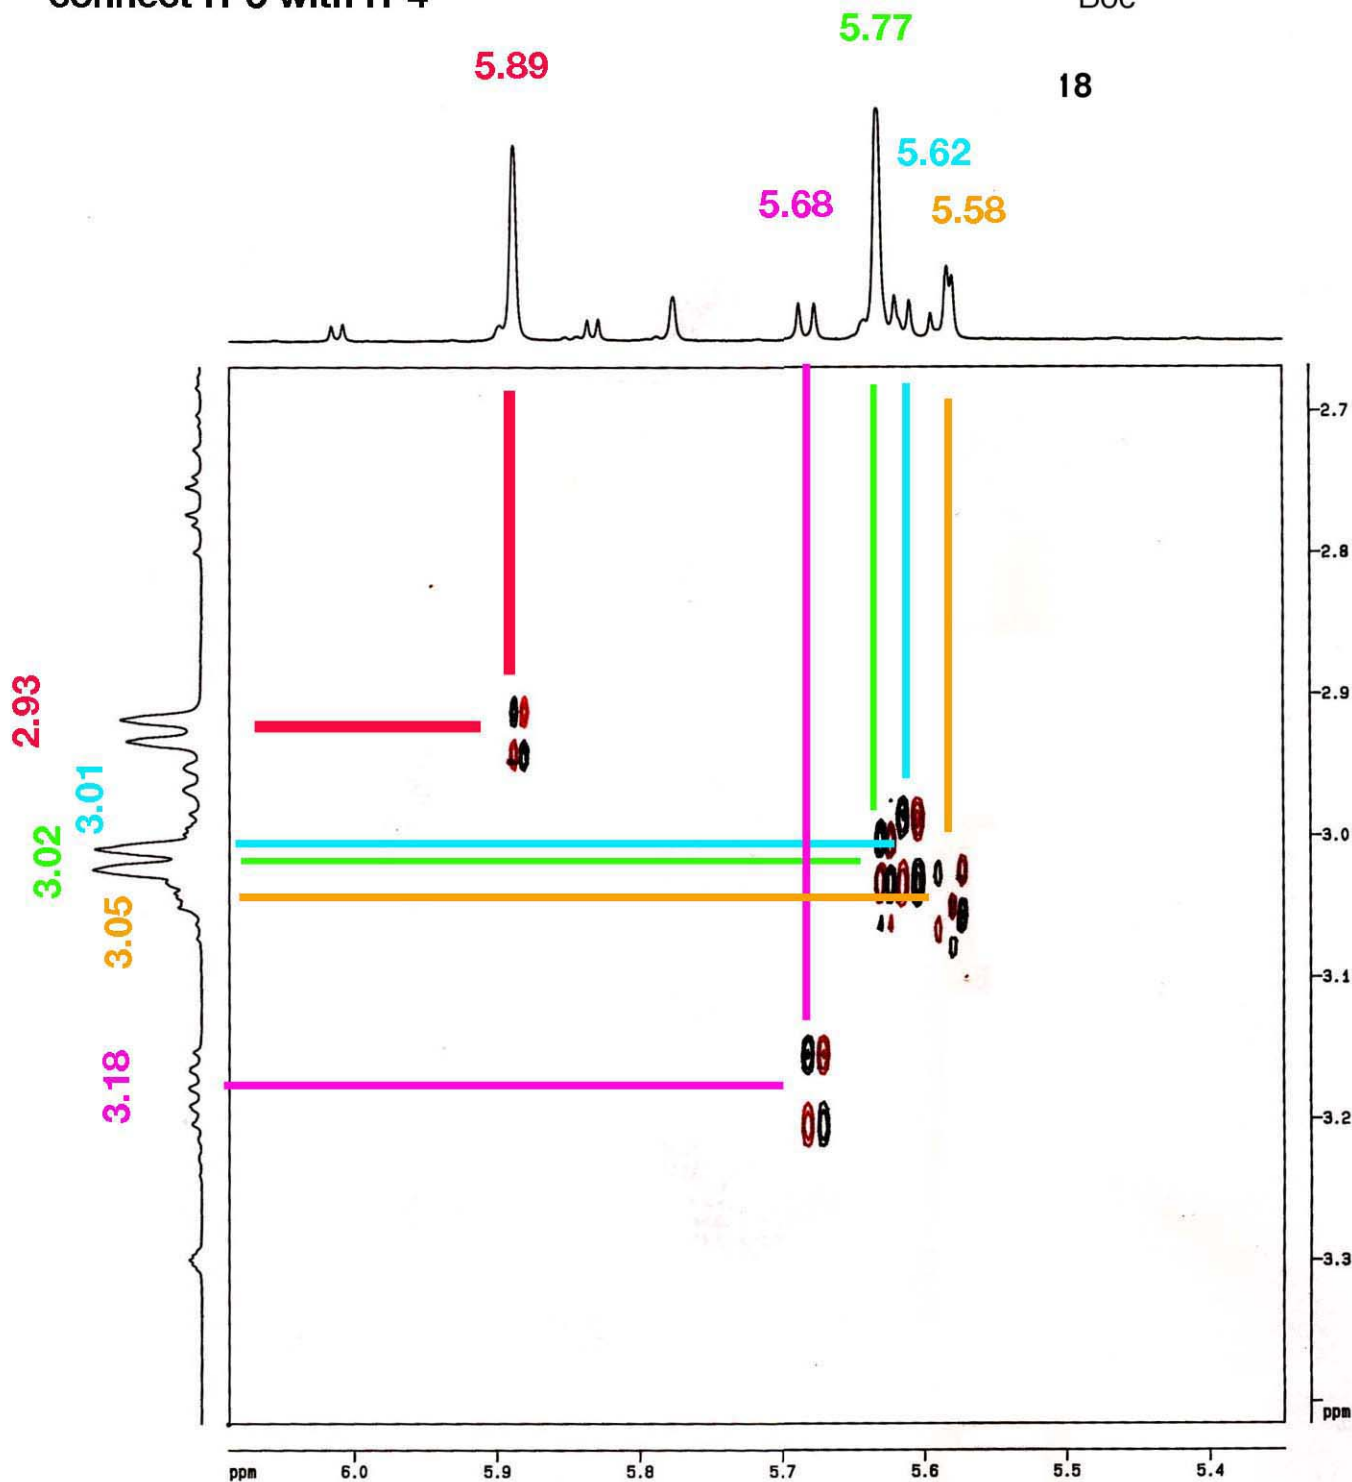

# Spectrum 6

connecting H-4 to H-3A and H-3B  
and H-3A to H-3B

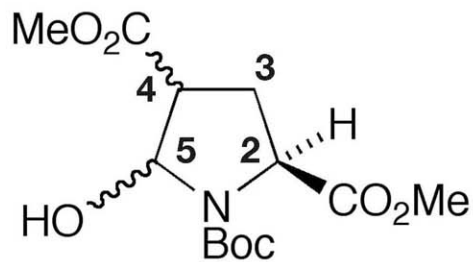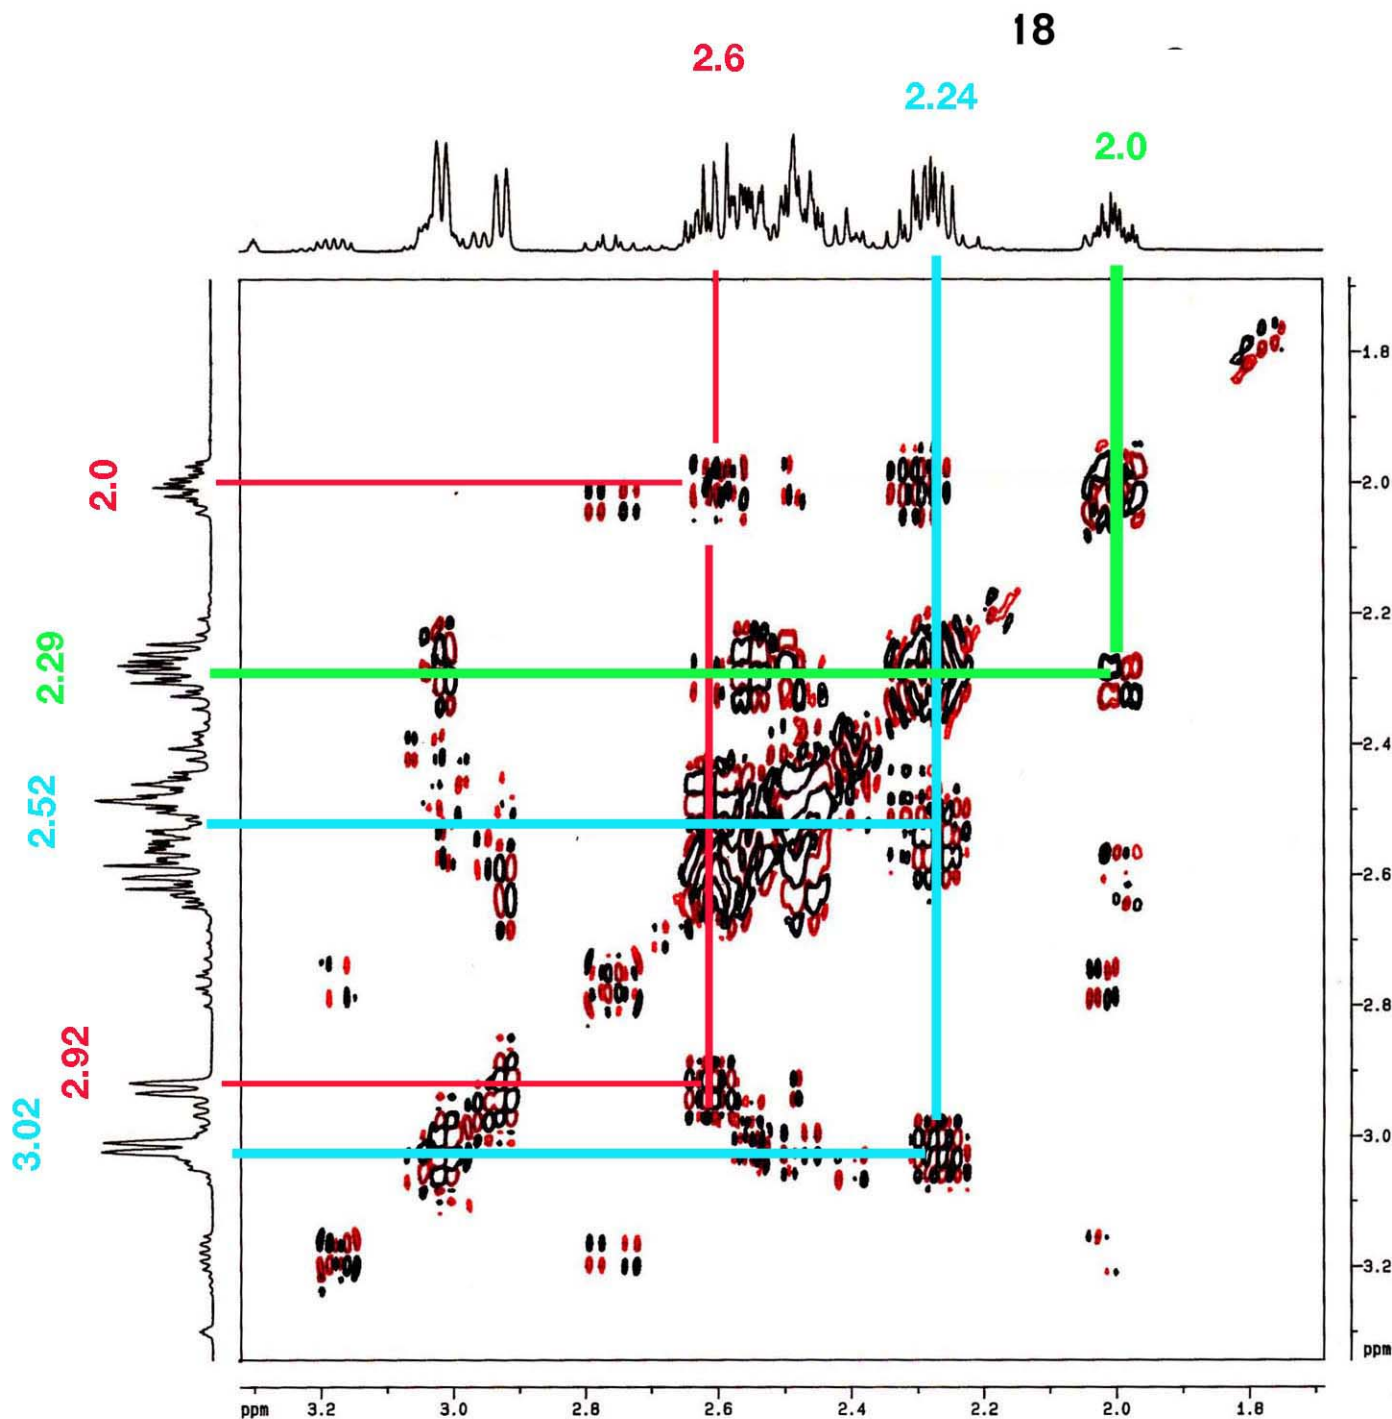

Supplement: b503900b.pdf [file b503900b.pdf]
